# Supplementary material
Source: MDPI journal article supplement (https://www.mdpi.com/2673-9976/11/1/68)
Supplement: s1 [file s1]

# The effect of effective microorganisms on the growth and the nutrient content of tomato transplants

Margit Olle

NPO Veggies Cultivation

E-mail: [margit.olle@gmail.com](mailto:margit.olle@gmail.com)

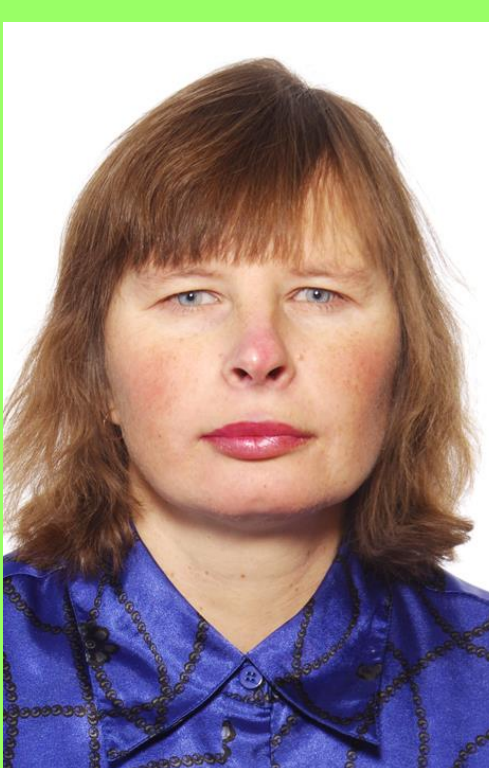

## Introduction

- Effective microorganisms (EM) technology was first developed in the 1970's.
- EM is a mixture, containing primarily lactic acid bacteria, photosynthetic bacteria, and yeast, maintained at pH 3.5.
- EM suppress the incidence of pests and diseases, solubilize minerals, conserve energy, increase photosynthetic efficiency, and fix biological nitrogen.

**PROBLEM** → Elongated, low quality tomato variety 'Valve' transplants.

**AIM** → The purpose of this investigation was to assess the influence of effective microorganisms on the growth and nutrient content of tomato transplants.

## Results

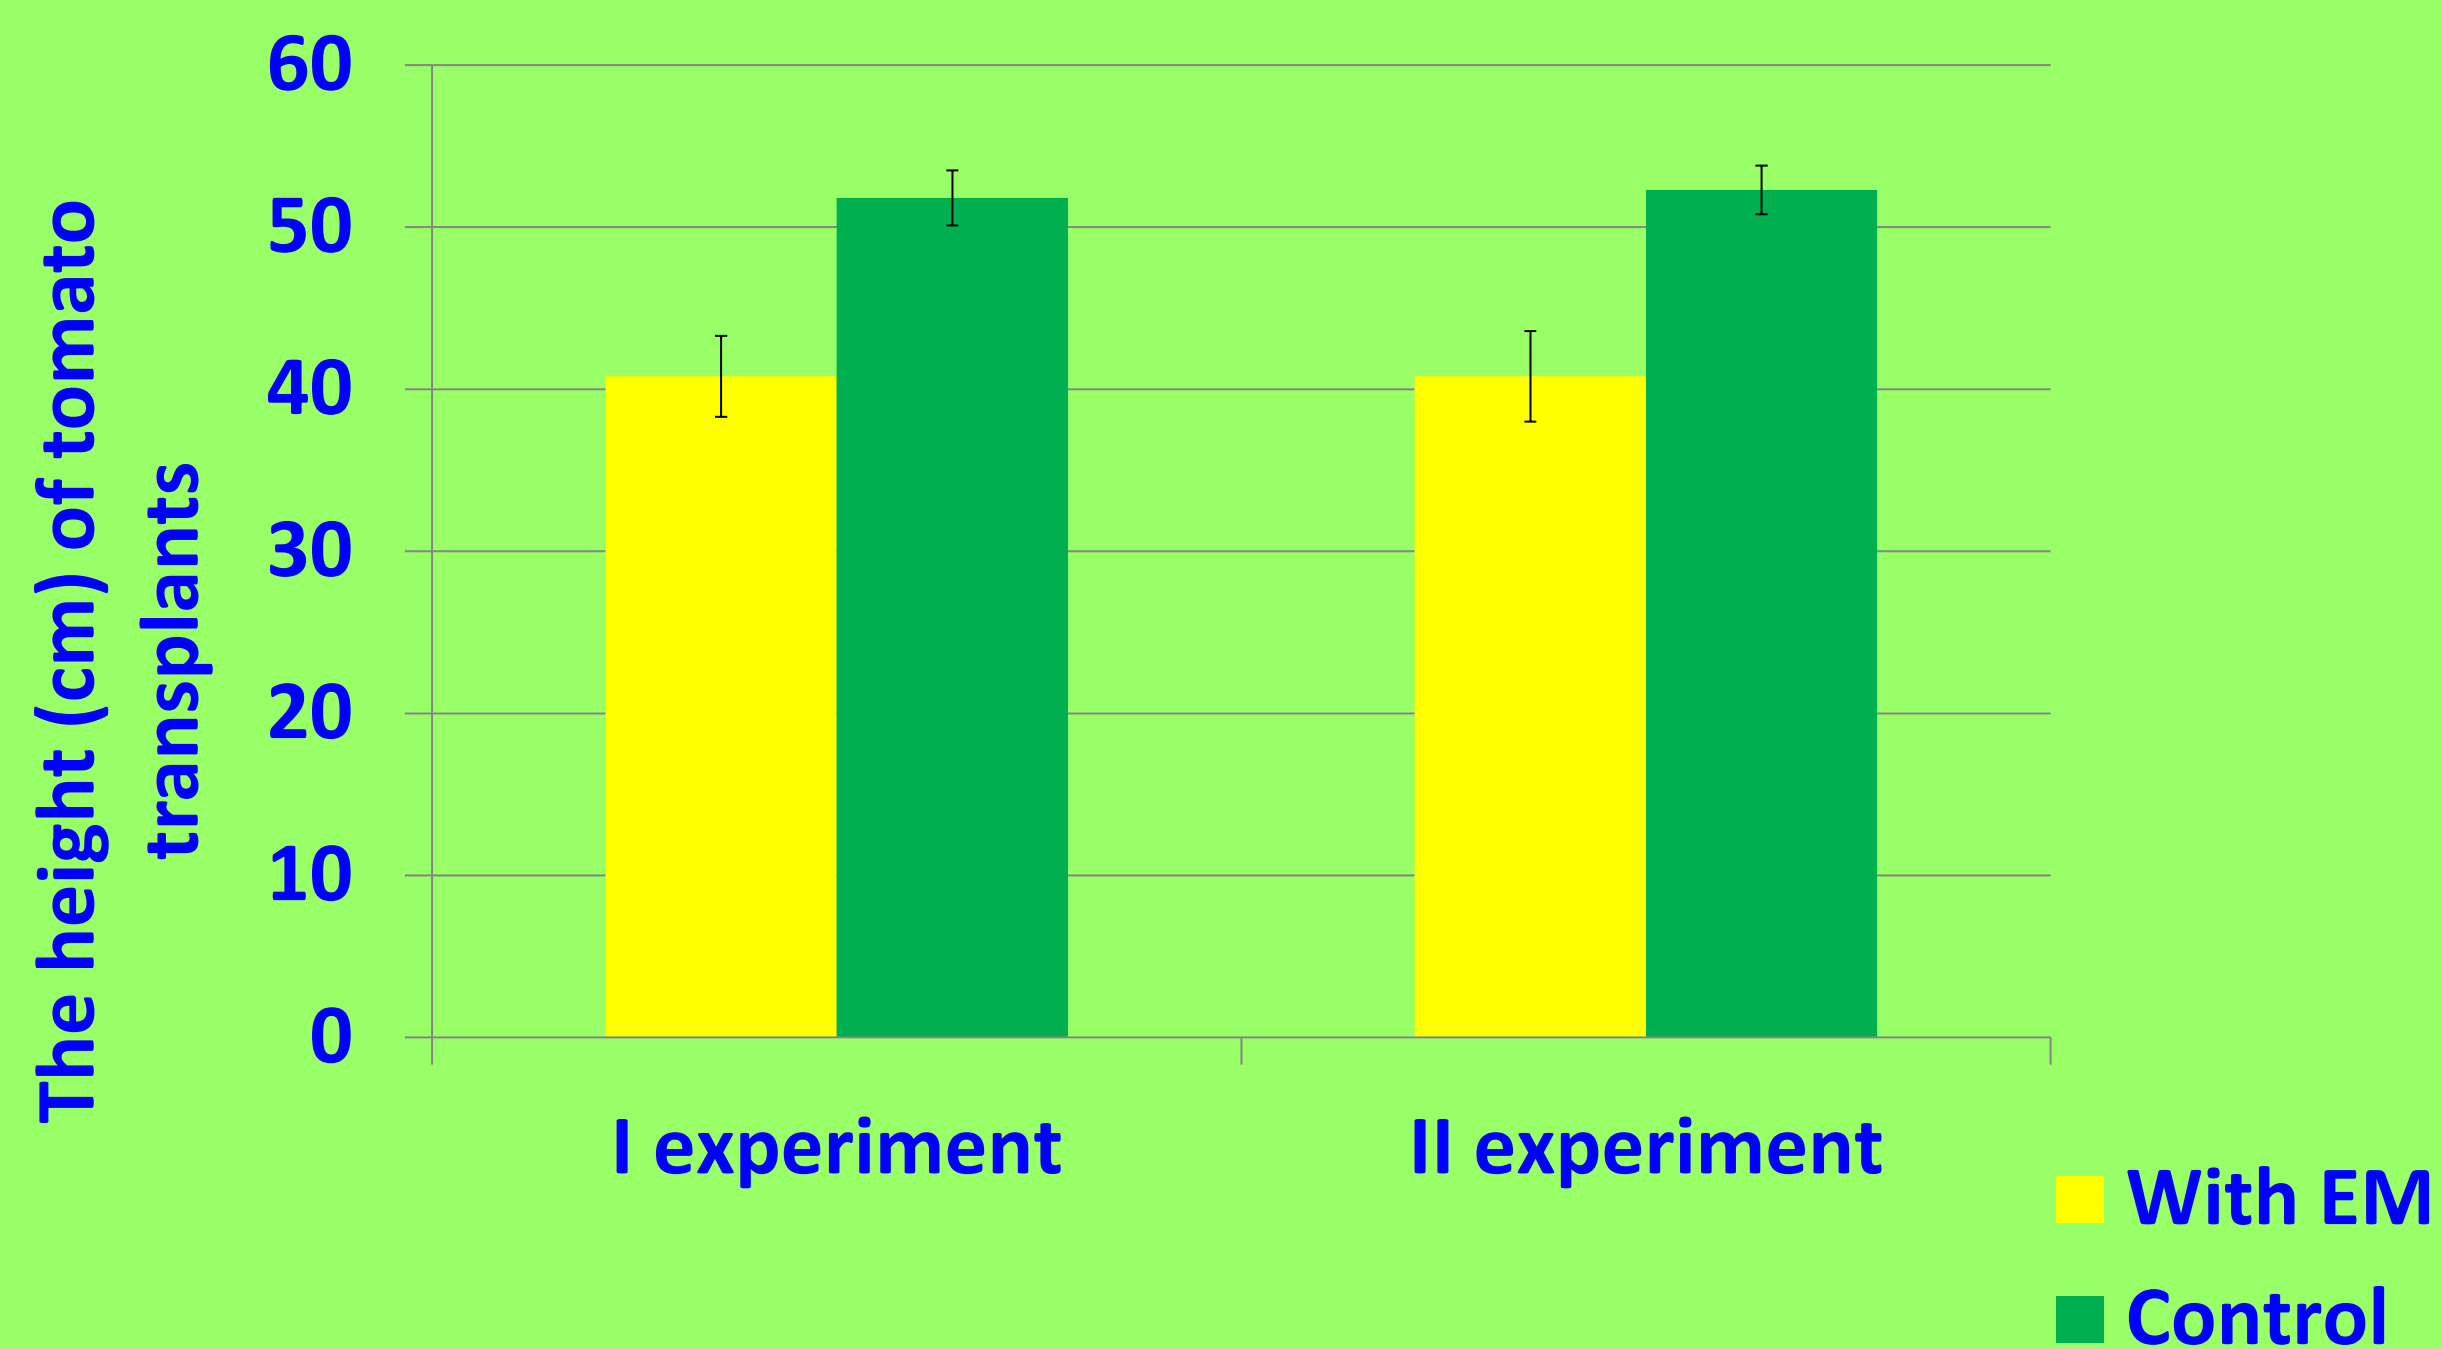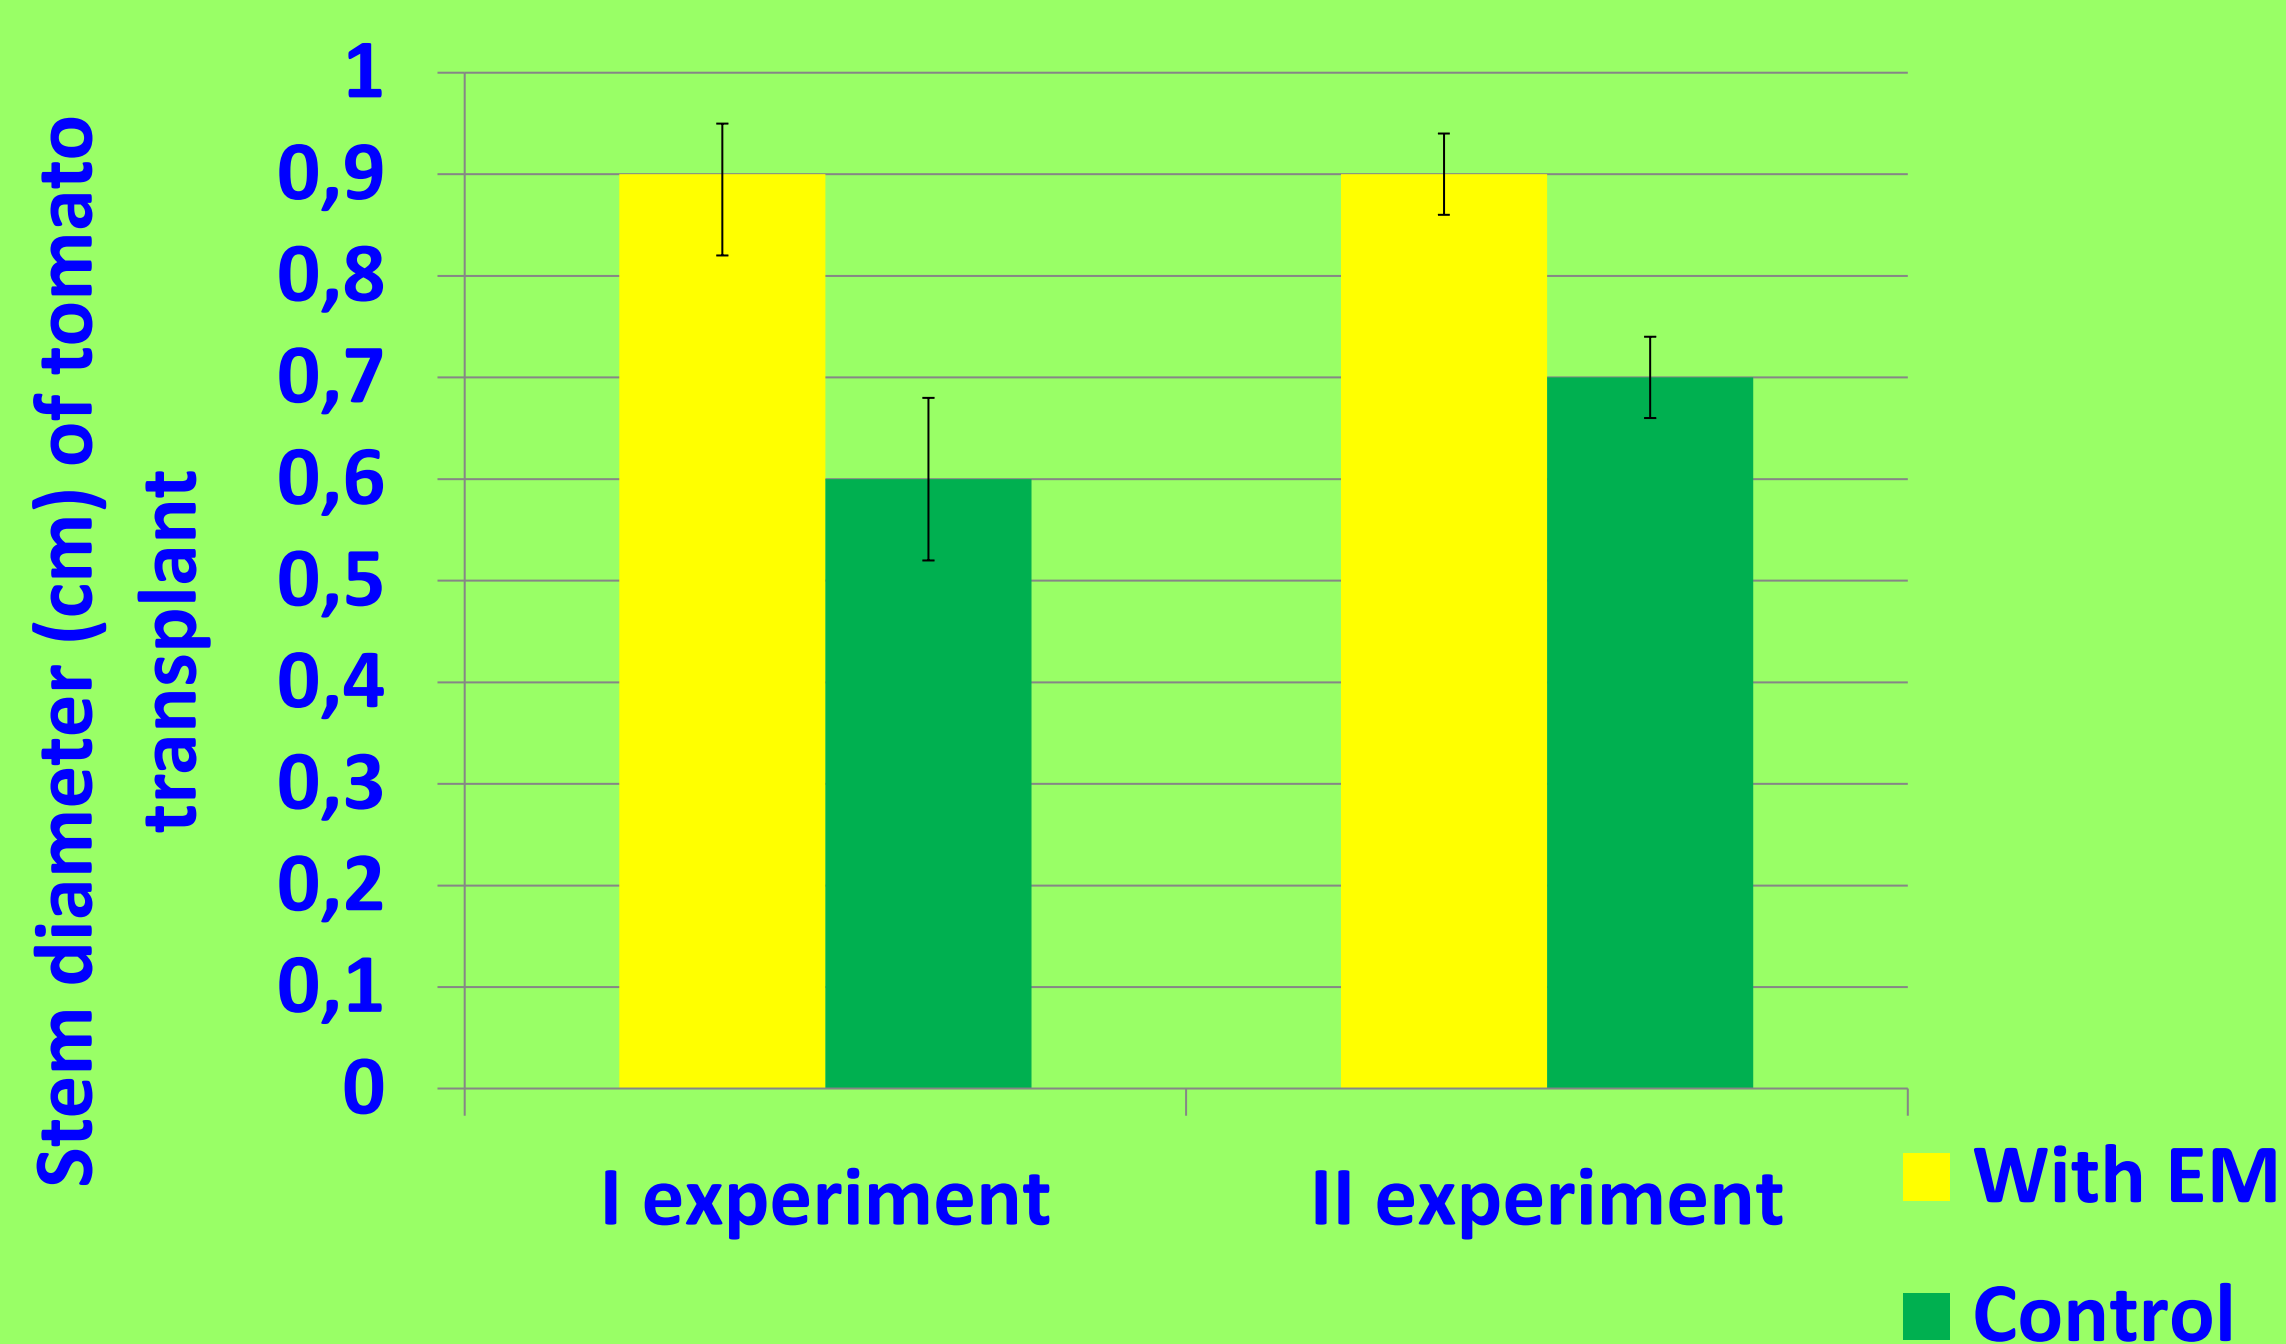

## Conclusion:

Tomato transplants stay compact, have thicker stems and contain more nutrients in EM treatment.

## Materials and Methods

### Experimental site and time:

Estonian Crop Research Institute greenhouses, Winter of 2014

### Substrate:

Peat-based mixture fertilized with Peat Care 11-25-24 (2 kg m<sup>-3</sup>), magnesium sulphate (0.5 kg m<sup>-3</sup>) and mixed with dolomite lime (7 kg m<sup>-3</sup>).

### Treatments:

| Item                       | EM treatment       | Control |
|----------------------------|--------------------|---------|
| Seeds soaking 0.5 hour     | EM 1:500 solution  | Water   |
| Substrate treatment        | EM 1:500 solution  | Water   |
| 3 true leaf stage spraying | EM 1:1000 solution | Water   |
| 1 week later               | EM 1:1000 solution | Water   |
| 1 week later               | EM 1:1000 solution | Water   |
| 1 week later               | EM 1:1000 solution | Water   |

### Replications and experimental design:

Randomized block design, plot size 6 plants, 4 replications, experiment repeated 2 times.

### Laboratory analyses:

N, P, K, Ca, Mg content

### Statistics:

ANOVA by Excel 2010, comparison of means by Fisher LSD test

## Results

### Table S1:

The contents of nitrogen, phosphorus, potassium, calcium, and magnesium in tomato transplants dry matter (%).

|              | N       | P      | K      | Ca     | Mg     |
|--------------|---------|--------|--------|--------|--------|
| EM treatment | 4.0 *** | 0.73 * | 5.0 ** | 2.3 ** | 0.68 * |
| Control      | 2.9     | 0.60   | 3.7    | 1.9    | 0.60   |

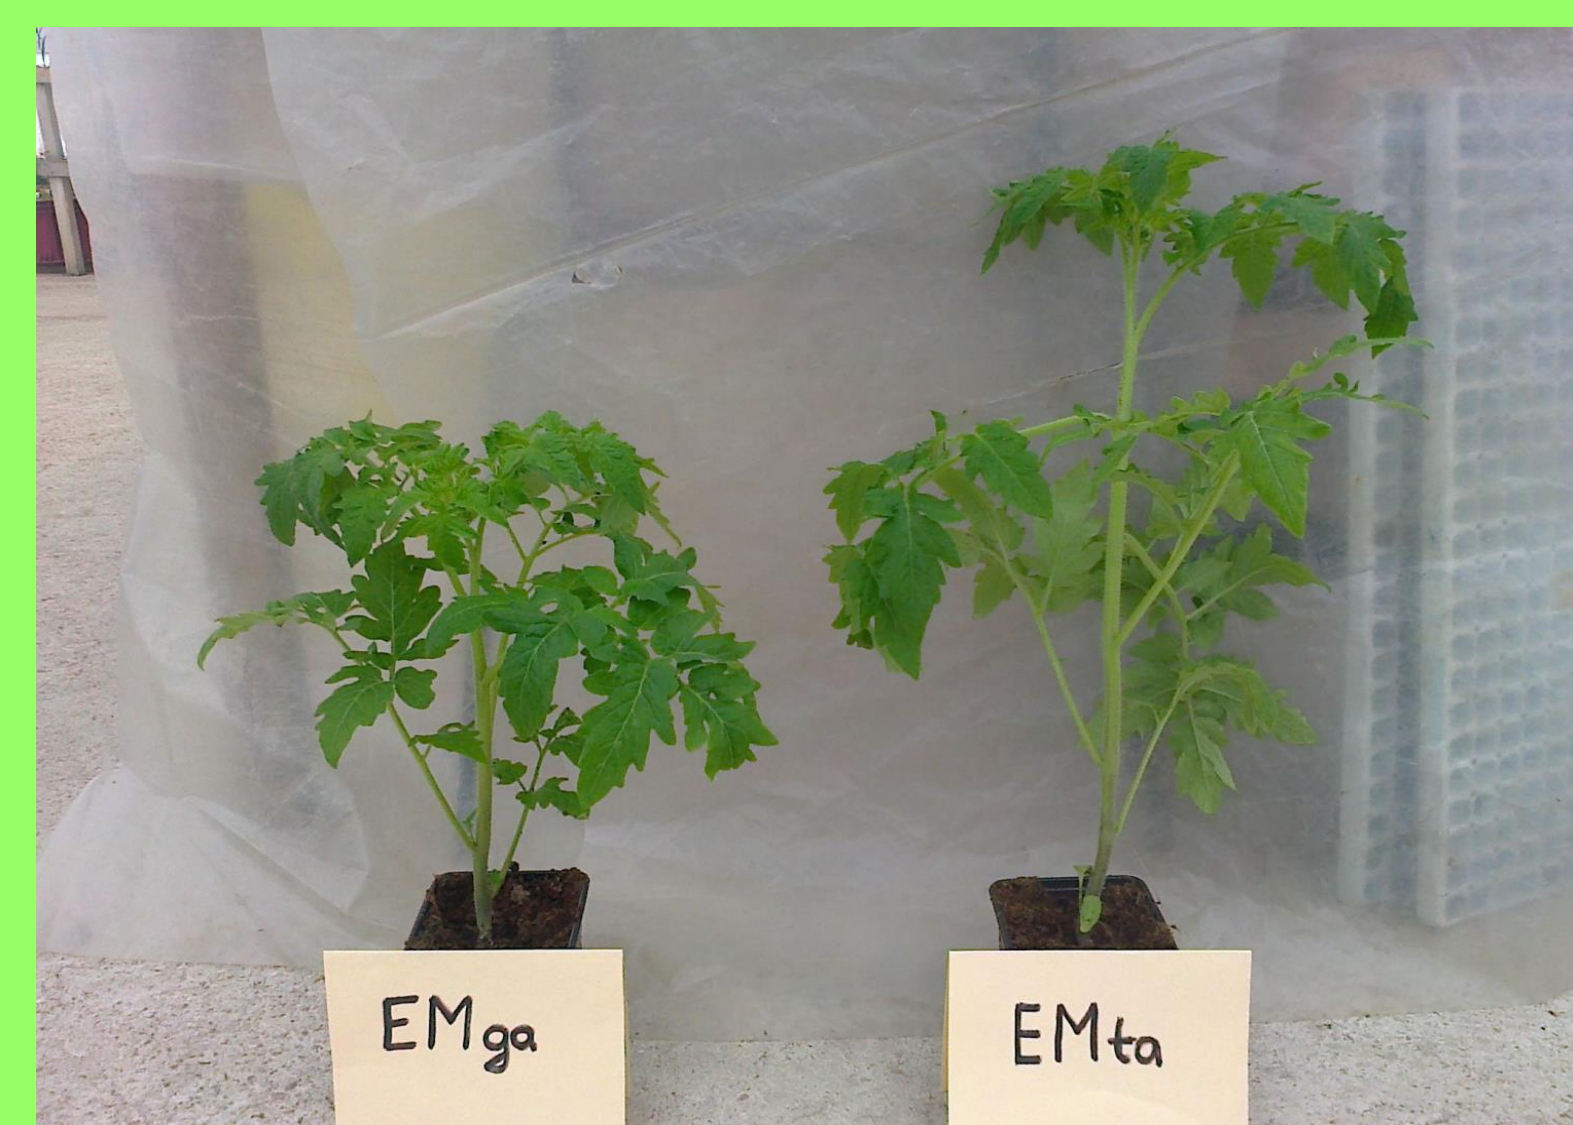

### Figure S1:

The picture of tomato transplants: on the left – EM treatment, on the right – Control treatment

**Acknowledgements:** This research was financially supported by the Estonian Agricultural Registers and Information Board, by the Jaagumäe Agro Ltd. and by the Estonian Crop Research Institute.
